# Supplementary material for: Protection against Different Genotypes of Newcastle Disease Viruses (NDV) Afforded by an Adenovirus-Vectored Fusion Protein and Live NDV Vaccines in Chickens
Source: MDPI journal article supplement (doi:10.3390/vaccines9020182), 2021-02-21

**Journal:** Vaccines- Special Issue on Vaccine Research against Significant Viral Diseases of Poultry

**Article:** Protection against different genotypes of Newcastle disease viruses (NDV) afforded by an adenovirus-vectored fusion protein and live NDV vaccines in chickens

**Authors:** Helena L. Ferreira, Patti J. Miller, David L. Suarez

**Supplemental Figure 2.** MDCK cells labelled with polyclonal antibody against F NDV protein and FITC anti-rabbit after 48 hours after infection/transduction. A) Negative control; B) cells infected with LaSota; C) cells transduced with adeno-F (200X).

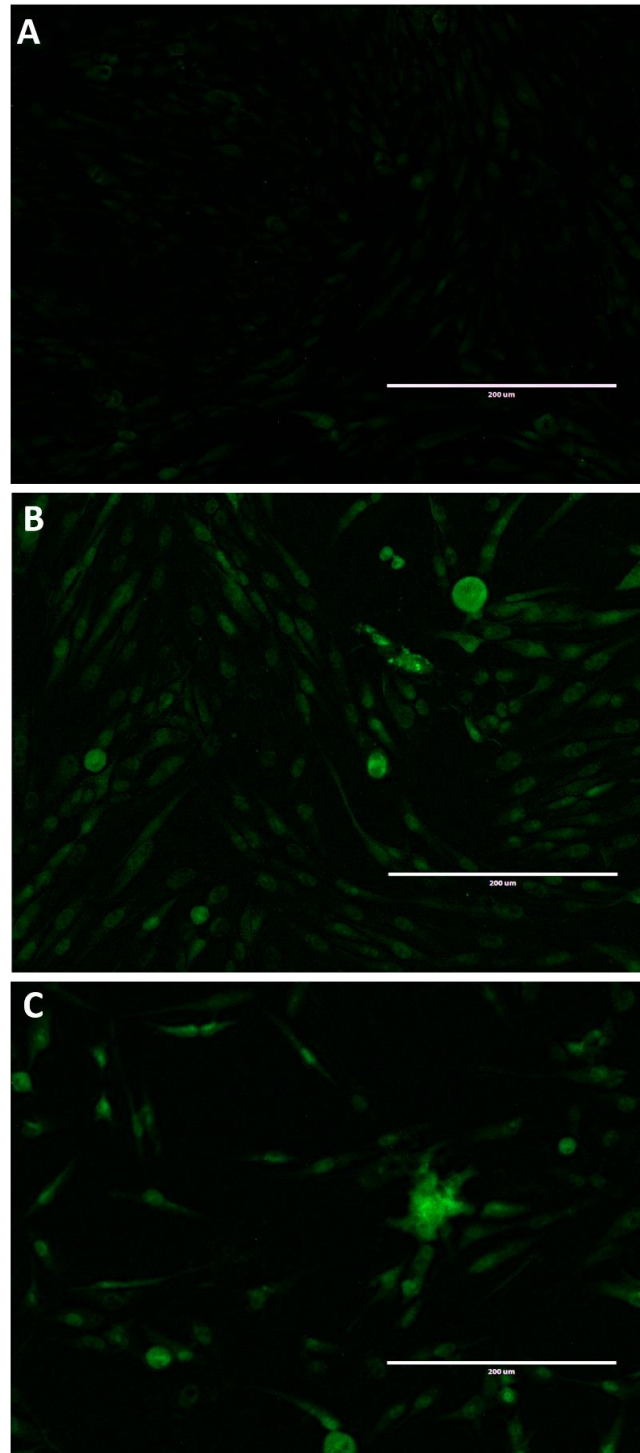

Supplement: s1 [file s1]
